# Supplementary material
Source: PubMed Central journal article supplement (PMC3397379)
Supplement: NIHMS379942-supplement-03.pdf [file NIHMS379942-supplement-03.pdf]

Supplemental table 3: primers for genes assayed with RT-PCR.

| Gene      | NCU number | Forward primer (5' to 3') | Reverse primer (5' to 3') |
|-----------|------------|---------------------------|---------------------------|
| Mat-A1    | NCU01958.1 | AGAAGGTCAACGGCTTCATGG     | CTCCTGCTCAAGGTAGGTCCG     |
| Mat-A2    | NCU01959.1 | GCAGTTTGC GTTCCGCCTCCT    | CCAGTTTCTTCCTCCCGCCTG     |
| Mat-A3    | NCU01960.1 | GGACATACTCGCAGTTTCGCC     | GGCTAGTACCATTGCTTTGAG     |
| Mat-a     | P36981.2   | GTCCCGTCAAGCTGTTCAAGC     | GGATTCTGCTCGCGGATCTCA     |
| HSP101    | NCU00104.1 | TCTTGTTACTCGCCAGCTTA      | CATTTCTGCTCGTCCTCATCATT   |
| HSF2      | NCU08480.1 | CCAGCTCAACATGTACGGATT     | AGCCTTCTGGTTGTTGCTGTA     |
| CDC6      | NCU02776.1 | AAAGAGGAGAAGGAGCACCAG     | TTTTCTTGTGGTTCTCAACG      |
| CDC12     | NCU03795.1 | TTCTCCACGACCATCAAGAAC     | AGGAATTCGATAATGGGCATC     |
| CDC3      | NCU08297.1 | TGAACATTGTGGACAACAGGA     | GAAAGCAGCAATCTCGTCATC     |
| CDC4A     | NCU05939.1 | AGGTTTACCAGACACACAGG      | AACGTGACTGGGCTTAACCTT     |
| CDC4B     | NCU06483.1 | TGCATACTCCGTGGACATA       | TAACTCCCCGAGACAACAATG     |
| TF-1      | NCU04179.1 | TACAACGGAAACGACCATCTC     | CAGCCTTGATGTCTTGTTCAT     |
| TF-2      | NCU08807.1 | TCTCTCTCCCCAGACTCCTC      | GTTCTGACACTTGGGTTGAA      |
| TF-3      | NCU03184.1 | ATTGCACTTCTCAAAGCCTGA     | TAGTAGTTGGAGCTGCCCTGA     |
| TF-4      | NCU03043.1 | CAGCTCCAAGTCTCAACAAG      | TGTGGACCTTCTTGTGTCTCC     |
| STE18     | NCU00041.1 | CGCAAATCAAGAAGAACAAGC     | GTGTGCTGTTGCAGTAGGTGA     |
| TEA1      | NCU00622.1 | GTTTATTGTGTTTGGCGGAGA     | GTGACCATGGAATGGTTTGTG     |
| CON8      | NCU10997.1 | GAGAGACCAAGCTCTTTCCT      | TGAGATGGCCGTCTACCATAC     |
| CON10     | NCU07325.1 | GGCTGGCACTGGTAACGA        | CCCTTGGAAGCAATTTTCG       |
| CCG-1     | NCU03753.1 | CTCAAGAACGCTGCCAACTAC     | CTTAGCGTCGTGCTTGTCTC      |
| CCG-2     | NCU08457.1 | AGCCTTACTGCTGCCAGTCTA     | TGATGATGAGGAAGGAGTTGC     |
| CCG-4     | NCU02500.1 | CTTCTCCGTGACACCACCTT      | GTTGTACATGGCGTGCAAGT      |
| PRE1      | NCU00138.1 | GGACACTGAAGAACCCATTGA     | ATCTGAGGAGGTCCTGTGGTT     |
| PRE2      | NCU05758.1 | ATTTCTGTTGTTTACGTTTTTG    | CCAGCAAACAAGACAGGGATA     |
| PPG2      | NCU04316.1 | GCTGGTTCTGGTGATTGTTCAT    | CAACTCGCTCTCGTCAAATC      |
| Control 1 | NCU06783.1 | AGATCCTGATCCCCGTCGACC     | AACCTCGGCAGAGGTGGCATC     |
| Control 2 | NCU08924.1 | GAAGGCCATCCGCAAGTTCAC     | ACCGGCCATGTTGCCGTCTG      |
