# Supplementary material
Source: PubMed Central journal article supplement (PMC3397379)
Supplement: NIHMS379942-supplement-04.pdf [file NIHMS379942-supplement-04.pdf]

Supplemental table 4. Expression of genes of interests across asexual development in *Neurospora crassa*.

| Expression of histones and histone variants         |      |      |      |      |      |      |                 |
|-----------------------------------------------------|------|------|------|------|------|------|-----------------|
| Unique ID                                           | al36 | al60 | al96 | Al36 | Al60 | Al96 | Gene/protein    |
| NCU02435                                            | 1.10 | 1    | 1.48 | 1.15 | 1.05 | 1.23 | Histone H2B     |
| NCU02437                                            | 1.10 | 1    | 1.37 | 1.00 | 1.06 | 1.09 | Histone H2A     |
| NCU01635                                            | 1.09 | 1.73 | 1.81 | 1    | 1.67 | 1.58 | Histone H3      |
| NCU04338                                            | 1.21 | 1.31 | 1.60 | 1    | 1.41 | 1.49 | H4v             |
| NCU05347                                            | 1.79 | 1.55 | 1.15 | 1.06 | 1.60 | 1    | H2Az            |
| NCU06863                                            | 1    | 2.65 | 3.43 | 1.26 | 2.84 | 1.84 | Histone H1      |
| NCU09995                                            | 1.05 | 1.17 | 1.24 | 1    | 1.12 | 1.24 | HMG1.2/ScNhp6   |
| NCU09248                                            | 1.47 | 1.12 | 1    | 1.28 | 1.13 | 1.34 | HAP (CAAT-Bind) |
| NCU03073                                            | 1.18 | 1.15 | 1.25 | 1.10 | 1.36 | 1    | CHRAC17/POL II  |
| NCU02695                                            | 1.36 | 1.27 | 1    | 1.28 | 1.21 | 1.31 | HMG4            |
| NCU00145                                            | 1.08 | 1.10 | NA   | 1.01 | 1.07 | 1    | H3v/ScCSE4      |
| Expression of gene involved in histone modification |      |      |      |      |      |      |                 |
| NCU06472                                            | 1    | 1.24 | 1.10 | 1.02 | 1.04 | 1.13 | ScHat1          |
| NCU02556                                            | 1.15 | 1.43 | 1.85 | 1.09 | 1.32 | 1    | HsTAF II250     |
| NCU07589                                            | 1.11 | 1.22 | 1.44 | 1.16 | 1.39 | 1    | SpAts1          |
| NCU04583                                            | 1.05 | 1.39 | 1.69 | 1.22 | 1.62 | 1    | GNAT-type       |
| NCU01525                                            | 1    | 1.10 | 1.27 | 1.08 | 1.08 | 1.13 | <i>had-1</i>    |
| NCU02795                                            | 1    | 1.62 | 1.71 | 1.06 | 1.12 | 1.38 | <i>had-2</i>    |
| NCU07018                                            | 1.05 | 1.02 | 1.30 | 1    | 1.12 | 1.24 | <i>had-4</i>    |
| NCU04737                                            | 1.10 | 1.24 | 1.09 | 1    | 1.10 | 1.18 | <i>nst-1</i>    |
| NCU04859                                            | 1.20 | 1.19 | 1.17 | 1.24 | 1.30 | 1    | <i>nst-4</i>    |
| NCU00203                                            | 1    | 1.11 | 1.14 | 1.07 | 1.23 | 1.20 | <i>nst-5</i>    |
| NCU05973                                            | 1.29 | 1.28 | 1.24 | 1.52 | 1.28 | 1    | <i>nst-6</i>    |
| NCU00269                                            | 1.01 | 1.48 | 1    | 1.07 | 1.19 | 1.41 | <i>set-2</i>    |
| NCU01932                                            | 1.16 | 1.06 | 1.00 | 1.11 | 1.16 | 1    | <i>set-3</i>    |
| NCU07496                                            | 1    | 1.09 | 1.11 | 1.06 | 1.14 | 1.46 | <i>set-7</i>    |
| NCU07459                                            | 1.58 | 1    | 1.09 | 1.65 | 1.03 | 1.06 | <i>prm-1</i>    |
| NCU03937                                            | 1.16 | 1.35 | 1.46 | 1    | 1.35 | 1.38 | ScGal83         |
| NCU03187                                            | 1.32 | 1.42 | 1.09 | 1.05 | 1.19 | 1    | <i>nim-1</i>    |

| Expression of some transcription factors |      |      |      |      |      |      |                           |
|------------------------------------------|------|------|------|------|------|------|---------------------------|
| Unique ID                                | al36 | al60 | al96 | Al36 | Al60 | Al96 | Gene/protein              |
| NCU03686                                 | 1    | 2.48 | 2.76 | 1.12 | 2.34 | 4.25 | Upc2p like, asexual devel |
| NCU00499                                 | 1    | 2.85 | 2.61 | 1.20 | 2.66 | 3.51 | sex/asex/basal hyphae     |
| NCU03593                                 | NA   | 1.27 | 1    | NA   | 1.23 | 1.66 | kal-1, asex/basal hyphae  |
| NCU02142                                 | 1.20 | 1.93 | 1.94 | 1    | 1.98 | 2.10 | S.p. Ntf1 like            |
| NCU04179                                 | 2.46 | 3.12 | 1    | 2.83 | 1.88 | 1.73 | C2H2, asexual devel       |
| NCU01629                                 | 1.06 | 3.09 | 1.78 | 1    | 2.56 | 2.18 | C2H2, Kruppel-like factor |
| NCU08807                                 | 1    | 1.84 | 3.60 | 2.20 | 1.99 | 4.82 | C2H2, CRE-1 repressor     |
| NCU03043                                 | 1    | 2.04 | 1.98 | 1.03 | 1.84 | 2.49 | C2H2, fle gene            |

|          |      |      |      |      |      |      |                            |
|----------|------|------|------|------|------|------|----------------------------|
| NCU03184 | 2.14 | 2.43 | 1    | 2.21 | 1.49 | 2.20 | C2H2                       |
| NCU09333 | 1    | 3.51 | 3.52 | 1.58 | 4.29 | 3.35 | C2H2, ace1 like            |
| NCU06744 | 1    | 2.35 | 2.00 | 1.27 | 3.90 | 1.87 | bHLH CAD70402              |
| NCU03905 | 1.13 | 1.48 | 1.82 | 1    | 1.33 | 2.05 | B-ZIP, AP-1-like           |
| NCU01459 | 1.04 | 1.88 | 2.11 | 1    | 1.86 | 2.85 | B-ZIP, ascospore lethal TF |
| NCU08744 | 1    | 2.50 | 2.81 | 1.05 | 2.61 | 2.76 | B-ZIP, unkonwn             |
| NCU03266 | 1.86 | 1.19 | 1    | 1.81 | 1.18 | 1.12 | Homeobox TF                |

---

Expression of cell division control/cycle genes

| Unique ID | al36 | al60 | al96 | Al36 | Al60 | Al96 | gene          |
|-----------|------|------|------|------|------|------|---------------|
| NCU08297  | 1.41 | 1.94 | 1.86 | 1    | 2.11 | 1.89 | <i>cdc-3</i>  |
| NCU06483  | 1    | 1.23 | 1.14 | 1.03 | 1.16 | 1.19 | <i>cdc-4</i>  |
| NCU05939  | 1    | 2.39 | 1.93 | 1.05 | 1.94 | 2.69 | <i>cdc-4</i>  |
| NCU06617  | 1.60 | 1    | 1.66 | 1.50 | 1.25 | 1.65 | <i>cdc-4</i>  |
| NCU06994  | 1.13 | 1.01 | 1.10 | 1.18 | 1    | 1.08 | <i>cdc-5</i>  |
| NCU02776  | NA   | NA   | NA   | 1    | 1.34 | 1.04 | <i>cdc-6</i>  |
| NCU03515  | 1.50 | 1.52 | 1.38 | 1    | 1.44 | 1.29 | <i>cdc-10</i> |
| NCU03795  | NA   | NA   | NA   | 1    | 1.17 | 1.26 | <i>cdc-12</i> |
| NCU02616  | 1    | 1.12 | 1.17 | 1.08 | 1.15 | 1.12 | <i>cdc-20</i> |
| NCU00472  | 1.14 | 1.06 | 1.10 | 1.10 | 1.12 | 1    | <i>cdc-37</i> |
| NCU06454  | 1.11 | 1.16 | 1    | 1.09 | 1.14 | 1.13 | <i>cdc-42</i> |
| NCU02160  | 1.14 | 1    | 1.21 | 1.04 | 1.17 | 1.07 | <i>cdc-42</i> |
| NCU08119  | 1.15 | 1.12 | 1.17 | 1.17 | 1.32 | 1    | <i>cdc-47</i> |
| NCU01171  | 1    | 1.29 | 1.32 | 1.11 | 1.33 | 1.04 | <i>cdc-46</i> |
| NCU09377  | 1.06 | 1.17 | 1.17 | 1    | 1.51 | 1.27 | <i>cdc-55</i> |
| NCU01164  | 1    | 1.34 | 1.14 | 1.01 | 1.08 | 1.23 | <i>cdc-68</i> |

---

Expression of heat shock proteins

| Unique ID | al36 | al60 | al96 | Al36 | Al60 | Al96 | gene                 |
|-----------|------|------|------|------|------|------|----------------------|
| NCU08512  | 1.03 | 1.28 | 1    | 1.07 | 1.12 | 1.33 | <i>hsf1</i>          |
| NCU09364  | 2.34 | 1.88 | 1    | 1.52 | 1.58 | 1.43 | <i>hsp30</i>         |
| NCU02630  | 1.32 | 1.05 | 1.14 | 1.24 | 1.14 | 1    | <i>hsp38</i>         |
| NCU09364  | 1.18 | 1.32 | 1.32 | 1.17 | 1.40 | 1    | <i>hsp30</i>         |
| NCU01589  | 1.84 | 1.24 | 1.30 | 1.47 | 1.25 | 1    | <i>hsp60</i>         |
| NCU09602  | 1.31 | 1.28 | 1.02 | 1.26 | 1    | 1.70 | <i>hsp70</i>         |
| NCU05269  | 1.52 | 1.10 | 1    | 1.50 | 1.35 | 1.31 | <i>hsp88</i>         |
| NCU01792  | 1.41 | 1.03 | 1.42 | 1.38 | 1.14 | 1    | <i>hsp90 related</i> |
| NCU04142  | 1.55 | 1.04 | 1.19 | 1.56 | 1    | 1.55 | <i>hsp90</i>         |
| NCU00104  | 1.36 | 1.08 | 1.96 | 1    | 3.35 | 2.34 | <i>hsp101</i>        |
| NCU02075  | 2.00 | 1.38 | 1    | 2.37 | 1.26 | 1.55 | <i>hsp SSB1</i>      |
| NCU00714  | 1.54 | 1.37 | 1.37 | 1    | 1.22 | 1.63 | <i>hsp like</i>      |

---

Expression of ccg genes and light responsive genes

| Unique ID | al36 | al60  | al96  | Al36 | Al60  | Al96  | gene         |
|-----------|------|-------|-------|------|-------|-------|--------------|
| NCU03753  | 2.07 | 11.64 | 21.19 | 1    | 10.79 | 10.39 | <i>ccg-1</i> |

|          |      |      |      |      |      |      |                    |
|----------|------|------|------|------|------|------|--------------------|
| NCU08457 | 5.38 | 2.23 | 1.99 | 2.20 | 2.36 | 1    | <i>ccg-2, eas</i>  |
| NCU01418 | 1    | 1.25 | 1.09 | 1.09 | 1.28 | 1.71 | <i>ccg-6</i>       |
| NCU01528 | 1    | 1.24 | 1.68 | 1.19 | 1.38 | 1.20 | <i>ccg-7</i>       |
| NCU05561 | 1.23 | 1.05 | 1.47 | 1    | 1.17 | 1.28 | <i>ccg-12, cmt</i> |
| NCU03967 | 1.04 | 1.85 | 1.87 | 1    | 2.05 | 2.54 | <i>vvd</i>         |
| NCU07267 | 1.42 | 2.54 | 3.48 | 1    | 2.89 | 3.57 | <i>bli-3</i>       |
| NCU04834 | 3.68 | 2.49 | 1    | 3.87 | 2.02 | 2.00 | <i>phy-1</i>       |
| NCU05790 | 1.69 | 1.68 | 1.40 | 1.54 | 1.99 | 1    | <i>phy-2</i>       |
| NCU10055 | 1.11 | 1.24 | 1.58 | 1    | 1.30 | 1.98 | <i>nop-1</i>       |

---

Expression of genes involved in conidiation

---

| Unique ID | al36 | al60  | al96  | Al36 | Al60  | Al96  | Gene/protein  |
|-----------|------|-------|-------|------|-------|-------|---------------|
| NCU06205  | 1.00 | 1.35  | 1.58  | 1    | 1.58  | 1.59  | <i>rco-1</i>  |
| NCU03725  | 1.47 | 2.12  | 2.71  | 1    | 2.23  | 2.73  | <i>vib-1</i>  |
| NCU03967  | 1.04 | 1.85  | 1.87  | 1    | 2.05  | 2.54  | <i>vvd</i>    |
| NCU09235  | 1    | 11.98 | 16.00 | 1.30 | 11.71 | 25.09 | <i>con-8</i>  |
| NCU08769  | 2.27 | 1.36  | 1.24  | 1.61 | 1.51  | 1     | <i>con-6</i>  |
| NCU07325  | 1    | 1.71  | 1.88  | 1.24 | 1.69  | 2.28  | <i>con-10</i> |
| NCU01797  | 1.22 | 1.02  | 1.18  | 1.06 | 1     | 1.67  | <i>nrc-2</i>  |
| NCU03200  | 1    | 1.08  | 1.09  | 1.15 | 1.37  | 1.26  | <i>sch9</i>   |
| NCU03737  | 1.34 | 1.16  | 1     | 1.62 | 1.18  | 1.54  | <i>tuf1</i>   |
| NCU00443  | 1.01 | 1.10  | 1.06  | 1    | 1.12  | 1.34  | Ran_Pb1       |
| NCU04173  | 1.13 | 1.24  | 1     | 1.10 | 1.15  | 1.45  | <i>act</i>    |
| NCU08332  | 1    | 1.33  | 1.55  | 1.08 | 1.19  | 1.29  | <i>hex-1</i>  |
| NCU07296  | 1.22 | 1.37  | 1.55  | 1    | 1.41  | 1.29  | <i>cot-1</i>  |

---

Expression of genes involved in signal pathways

---

| Unique ID | al36 | al60 | al96 | Al36 | Al60 | Al96  | Gene/protein               |
|-----------|------|------|------|------|------|-------|----------------------------|
| NCU06240  | 1.05 | 1.27 | 1.32 | 1    | 1.28 | 1.33  | <i>pka</i>                 |
| NCU02393  | 1    | 1.06 | 1.53 | 1.05 | 1.08 | 2.11  | <i>mak2</i>                |
| NCU06419  | 1    | 1.38 | 1.80 | 1.24 | 1.49 | 1.88  | <i>mek1</i>                |
| NCU00587  | 1.53 | 1.03 | 1    | 1.60 | 1.00 | 1.50  | <i>os5</i>                 |
| NCU07024  | 1.06 | 1.35 | 1.47 | 1    | 1.29 | 1.56  | <i>os2</i>                 |
| NCU04096  | 1.53 | 1.81 | 1    | 1.23 | 1.67 | 1.20  | <i>mst3</i>                |
| NCU08791  | 1.05 | 1.95 | 1.96 | 1    | 1.65 | 1.72  | <i>so</i>                  |
| NCU00622  | NA   | NA   | NA   | 1    | 1.09 | 1.07  | <i>S. pombe tea-1 like</i> |
| NCU04050  | 1.38 | 1    | 1.48 | 1.50 | 1.24 | 1.15  | <i>cpc-1</i>               |
| NCU01871  | 1.17 | 1.66 | 1.30 | 1    | 1.53 | 1.60  | <i>mcm</i>                 |
| NCU08739  | 1    | 8.73 | 6.46 | 2.20 | 9.14 | 17.63 | endothiapepsin precursor   |
| NCU00041  | 1    | 1.18 | 1.65 | NA   | NA   | NA    | <i>Ste18</i>               |
| NCU06245  | 1.08 | 1.42 | 1.06 | 1    | 1.32 | 1.09  | <i>col</i>                 |
